# Supplementary material
Source: PubMed Central journal article supplement (PMC6910642)
Supplement: jnm223727SupplementaryData.pdf [file jnm223727SupplementaryData.pdf]

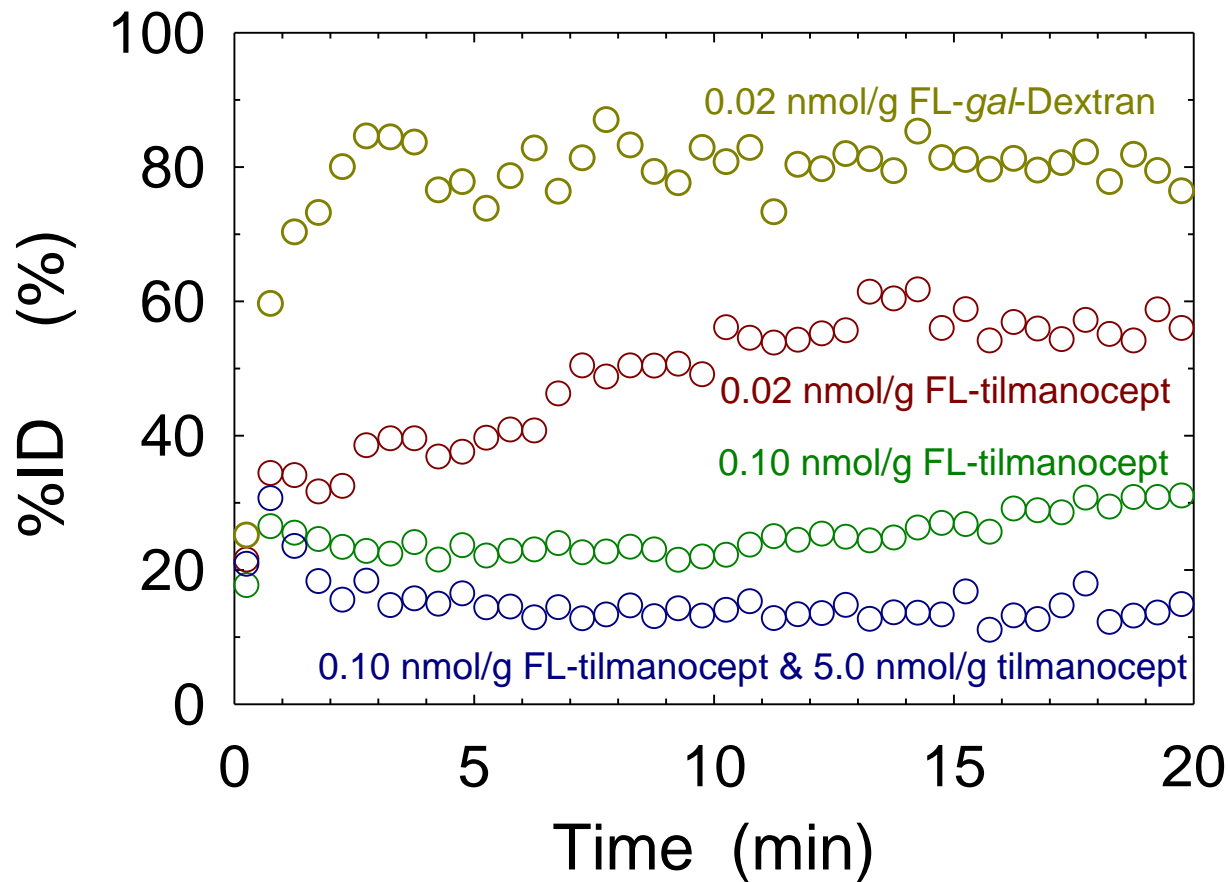

**Supplemental Figure 1:** Liver time-activity curves demonstrated receptor-mediated accumulation of Ga-68-labeled *IRDye800*-tilmanocept, which influenced tilmanocept uptake by the renal cortex. low (0.02 nmol/g) scaled molar dose of <sup>68</sup>Ga-labeled-*IRDye800*-tilmanocept (FL-tilmanocept) or <sup>68</sup>Ga-labeled-DTPA-*IRDye800*-galactosyl-dextran (FL-*gal*-dextran), or a high (0.10 nmol/g) scaled dose of FL-tilmanocept, or a coinjection of FL-tilmanocept and 5.0 nmol/g tilmanocept.

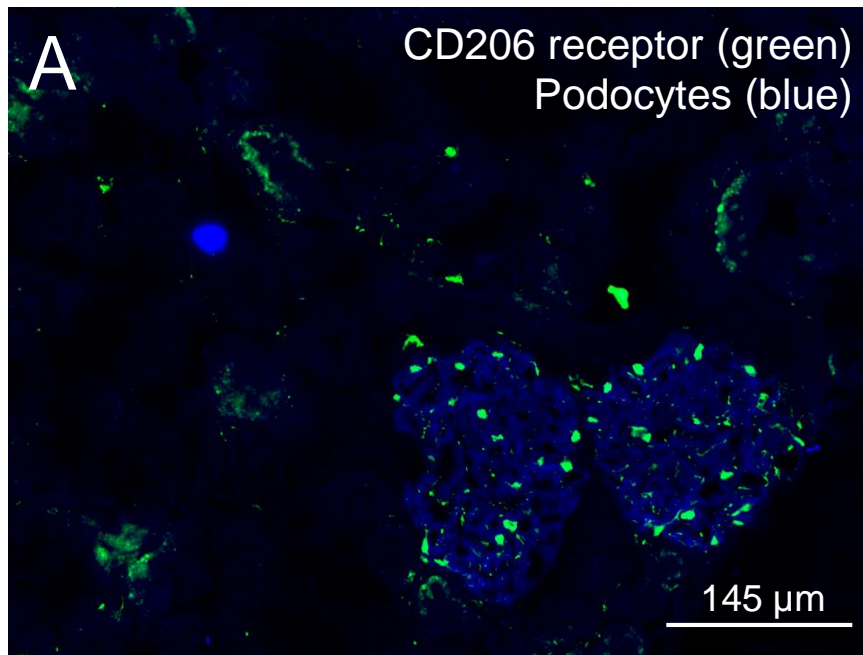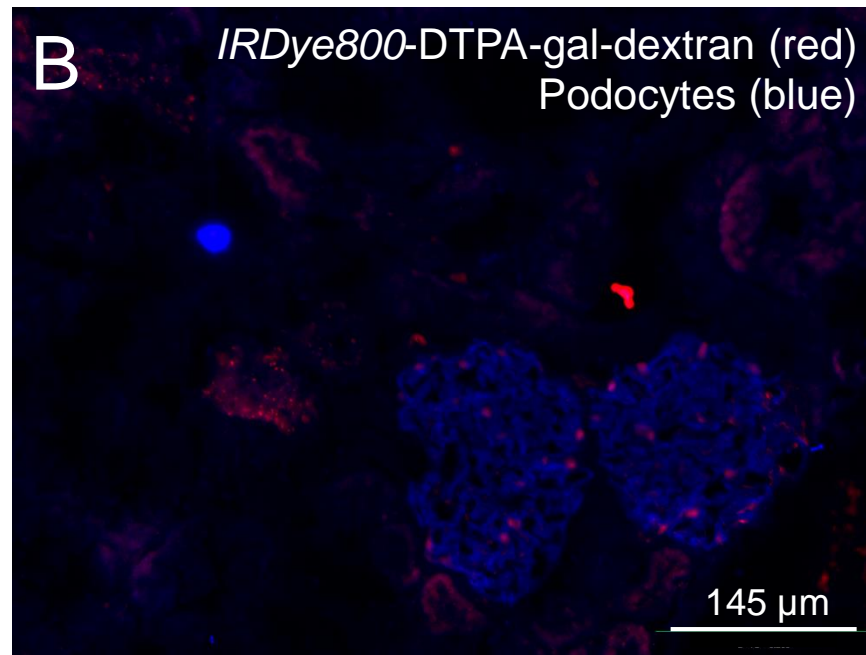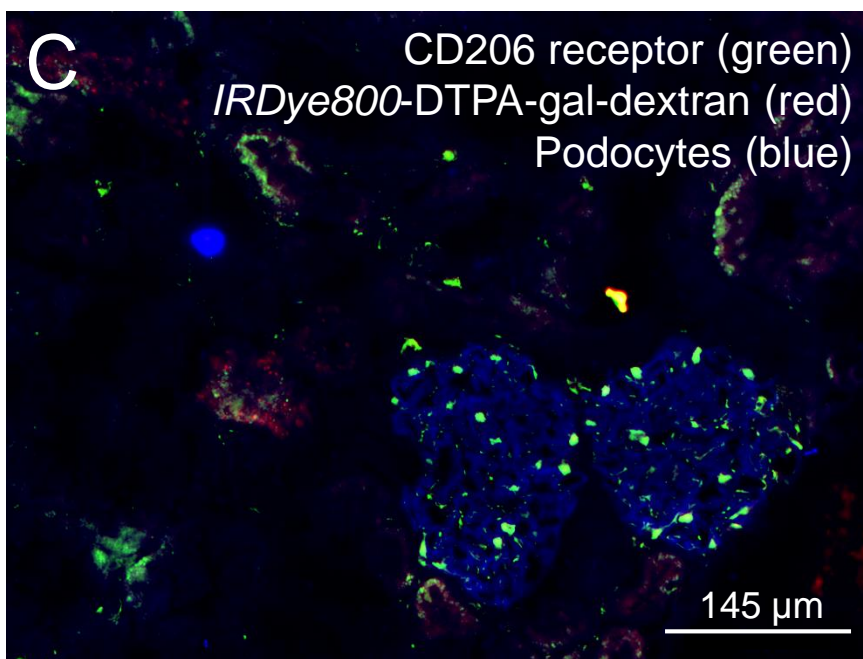

**Supplemental Figure 2A.** Histologic demonstration of tilmanocept specificity for the CD206 receptor. Three histomicrographs from the same section (frozen section, 5 μm) of a healthy rat kidney excised 40 minutes after a 0.02-nmol/g injection of *IRDye800*CW-DTPA-galactosyl-dextran radiolabeled with gallium-68. **(A)** A dual-channel composite (*AlexaFluor488*, *AlexaFluor647*) at 20x magnification representing the distribution of podocytes (blue) and CD206 (green). **(B)** A dual-channel composite (*AlexaFluor488*, *IRDye800*CW, 20x) demonstrating the distribution of podocytes (blue) and the very low presence of *IRDye800*-DTPA-galactosyl-dextran (red). **(C)** A three-channel composite (*AlexaFluor488*, *AlexaFluor647*, *IRDye800*CW, 20x), which demonstrates the lack co-localization (yellow) of *IRDye800*-DTPA-galactosyl-dextran (red) and CD206 (green) within the glomerular compartment (blue).

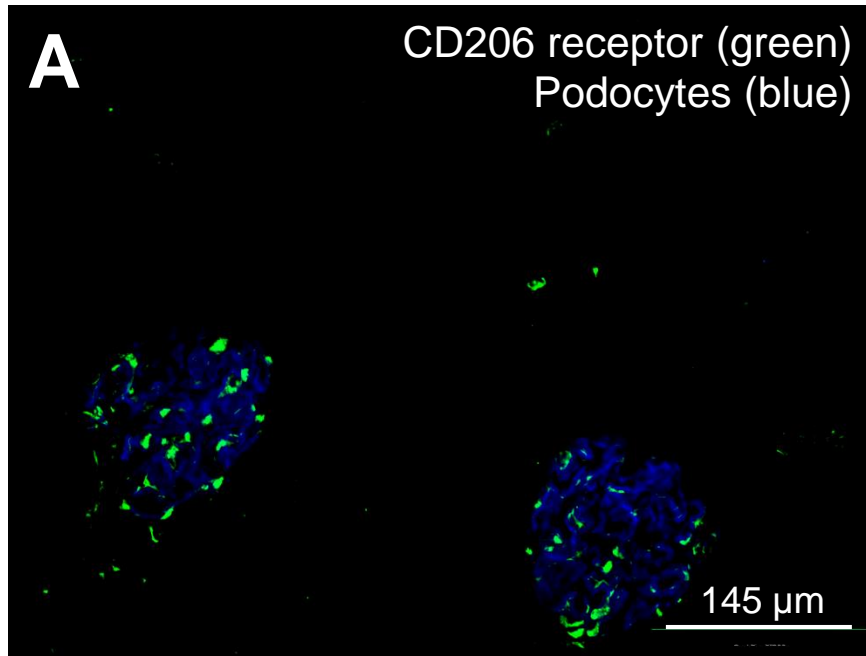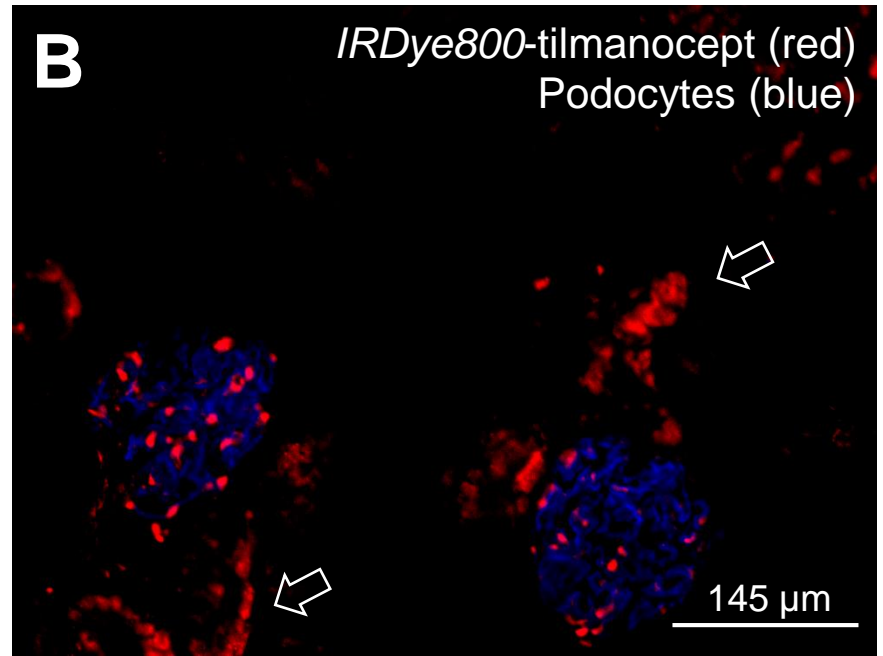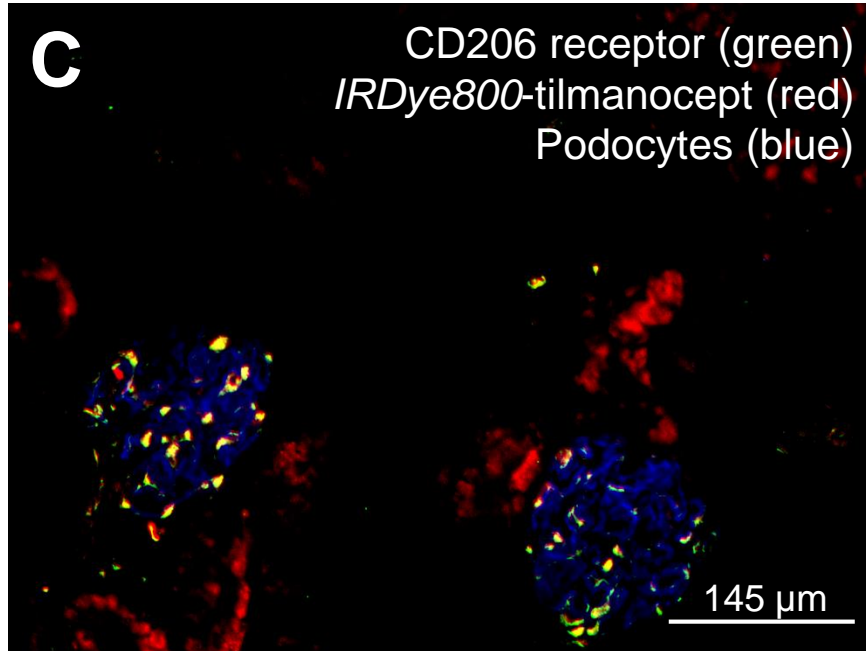

**Supplemental Figure 3A.** Histologic demonstration of tilmanocept binding to the CD206 receptor within the mesangium. Three histomicrographs from the same section (frozen section, 5 μm) of a healthy rat kidney excised 40 minutes after a 0.1 nmol/g injection of IRDye800-tilmanocept radiolabeled with gallium-68. **(A)** A dual-channel composite (*AlexaFluor488*, *AlexaFluor647*) at 20x magnification representing the distribution of podocytes (blue) and CD206 (green). **(B)** A dual-channel composite (*AlexaFluor488*, *IRDye800CW*, 20x) representing the distribution of podocytes (blue) and tilmanocept (red). The presence of IRDye800 (red) outside (arrows) of the podocyte (blue) fields is consistent with filtered IRDye800-tilmanocept within the renal tubules; the urinary bladder of this rat accumulated 14% of the dose during the 40-minute imaging study. **(C)** A three-channel composite (*AlexaFluor488*, *AlexaFluor647*, *IRDye800CW*, 20x), which demonstrates co-localization (overlapping stains result in yellow) of tilmanocept (red) and CD206 (green) within the glomerular compartment (blue).
